# Supplementary material for: HMA6 and HMA8 are two chloroplast Cu+-ATPases with different enzymatic properties
Source: Oxford University Press journal article supplement (doi:10.1042/bsr20150065), 2015-04-22
Supplement: bsr035e201add.pdf [file bsr035e201add.pdf]

**Supplemental Table 1.** Bibliographic data of *in planta* characterizations of Arabidopsis *hma6/paa1*, *hma8/paa2* and *hma1* mutants.

|                                                                                                                                                                                                                                                                                                                                                                                                                                                                                                                                                                                                                                                                                                                                                                                                                                                |
|------------------------------------------------------------------------------------------------------------------------------------------------------------------------------------------------------------------------------------------------------------------------------------------------------------------------------------------------------------------------------------------------------------------------------------------------------------------------------------------------------------------------------------------------------------------------------------------------------------------------------------------------------------------------------------------------------------------------------------------------------------------------------------------------------------------------------------------------|
| <p><b>Shikanai et al., 2003 [20]:</b></p> <p>Six independent mutants obtained by EMS in Arabidopsis Ler and Col ecotypes:</p> <ul style="list-style-type: none"> <li>- Severe growth-rate phenotype partially rescued by addition of Cu.</li> <li>- High light-sensitivity.</li> <li>- Reduced Cu content and Cu/ZnSOD activity in chloroplasts from mutants.</li> <li>- Defect in photosynthetic electron transport, plastocyanin level are reduced drastically.</li> </ul> <p><b>=&gt; PAA1/HMA6 is a critical component of a Cu transport system in chloroplasts responsible for cofactor delivery to plastocyanin and Cu/ZnSOD.</b></p>                                                                                                                                                                                                    |
| <p><b>Abdel-Ghany et al., 2005 [21]:</b></p> <p>Two independent mutants obtained by EMS in Arabidopsis Col ecotype:</p> <ul style="list-style-type: none"> <li>- Pale green leaf color, growth rate unaffected.</li> <li>- Reduced Cu content in thylakoids.</li> <li>- Defect in photosynthetic electron transport, plastocyanin level are reduced drastically.</li> </ul> <p><b>=&gt; PAA2/HMA8 is required for Cu delivery to the thylakoid lumen.</b></p>                                                                                                                                                                                                                                                                                                                                                                                  |
| <p><b>Seigneurin-Berny et al., 2006 [22]:</b></p> <p>Two independent insertional mutants in Arabidopsis Ws ecotype:</p> <ul style="list-style-type: none"> <li>- No phenotype in normal culture conditions.</li> <li>- High light-sensitivity, independent of Cu or Zn content.</li> <li>- Reduced Cu content and Cu/ZnSOD activity in chloroplasts from mutants.</li> <li>- In the chloroplast envelope from plants overexpressing AtHMA1, ATPase activity is enhanced by Cu.</li> </ul> <p><b>=&gt; AtHMA1 is an alternative pathway for Cu import into the chloroplast, essential in high light conditions</b></p>                                                                                                                                                                                                                          |
| <p><b>Kim et al., 2009 [25]</b></p> <p>Two independent insertional mutants in Arabidopsis Col-0 ecotype and one mutant in Ws ecotype:</p> <ul style="list-style-type: none"> <li>- No phenotype in normal culture conditions.</li> <li>- Col-0 <i>hma1</i> mutants are more sensitive to excess Zn, accumulate more Zn in their shoots and chloroplasts. Chloroplast Cu concentration is not affected.</li> </ul> <p><b>=&gt; AtHMA1 contributes to Zn detoxification by reducing Zn concentrations in Arabidopsis plastids</b></p>                                                                                                                                                                                                                                                                                                            |
| <p><b>Boutigny et al., 2014 [23]:</b></p> <p>Characterization of <i>paa1</i> mutant overexpressing HMA1 and <i>hma1 paa1</i> double mutant lines:</p> <ul style="list-style-type: none"> <li>- Evidence for an alternative Cu import route in chloroplasts that is neither HMA1 nor PAA1.</li> <li>- The lack of HMA1 reinforces the phenotype of the <i>paa1</i> mutant (slower growth rate and decreased Cu/ZnSOD activity).</li> <li>- Overexpression of HMA1 in a <i>paa1</i> mutant background induces Cu-dependent photosensitivity.</li> <li>- HMA1 and PAA1 behave as distinct pathways for Cu import and targeting to the chloroplast.</li> </ul> <p><b>=&gt; New evidence for the role of AtHMA1 in chloroplast Cu homeostasis. Evidence for a third envelope transporter involved in regulating chloroplast Cu homeostasis.</b></p> |

### Supplemental Figure 1

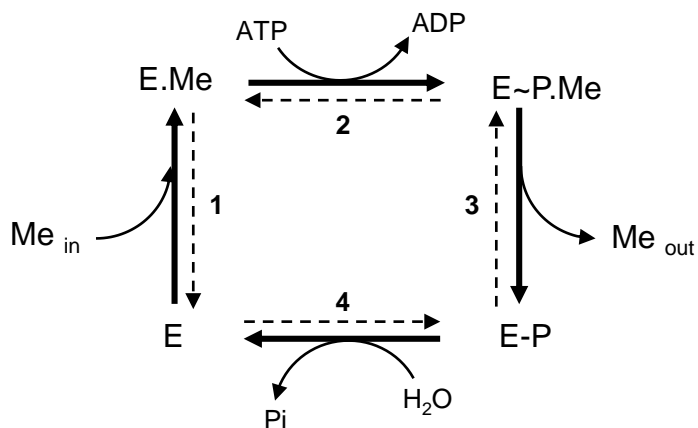

**Supplemental Figure 1. Catalytic cycle of P<sub>IB</sub>-type ATPases.** The bold arrows correspond to the forward cycle of P-type ATPases. E, E.Me, E~P.Me, E-P represent the major catalytic intermediates of the enzyme. The four steps are reversible. Me represents the transported metal. Me<sub>in</sub> and Me<sub>out</sub> represent the cytosolic and extracellular/luminal metal respectively.

## Supplemental Figure 2

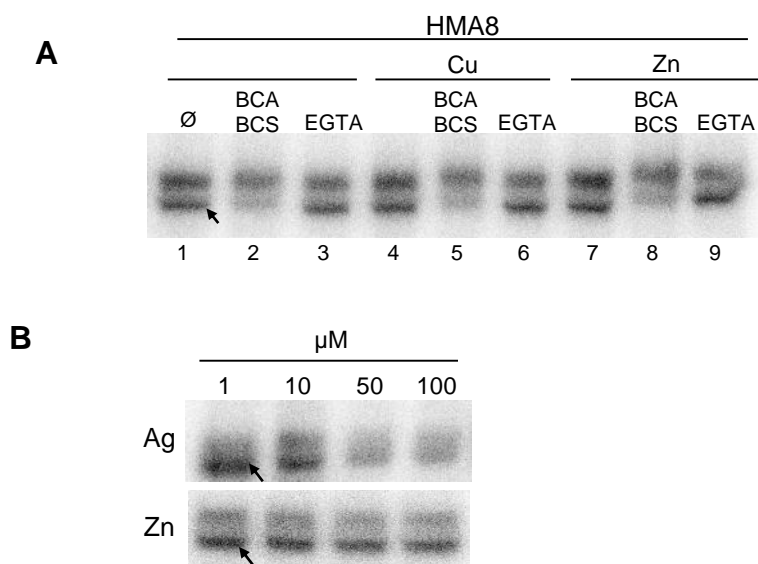

**Supplemental Figure 2. Metal dependence of HMA8 phosphorylation from [ $\gamma$ - $^{32}\text{P}$ ]ATP.** **A.** Membrane preparations containing HMA8 (150  $\mu\text{g}$ ) were phosphorylated without added metal ( $\emptyset$ , lanes 1 to 3), with 1  $\mu\text{M}$  of  $\text{CuSO}_4$  (lanes 4 to 6) or with 1  $\mu\text{M}$  of  $\text{ZnCl}_2$  (lanes 7 to 9). In each condition, BCA/BCS (lanes 2, 5 and 8) or EGTA (lanes 3, 6 and 9) was added as indicated in the figure. **B.** Membrane fractions (150  $\mu\text{g}$ ) containing HMA8 were incubated with various concentrations of  $\text{AgNO}_3$  or  $\text{ZnCl}_2$ . The arrows indicate HMA8 phosphorylation signals.

**Supplemental Figure 3**

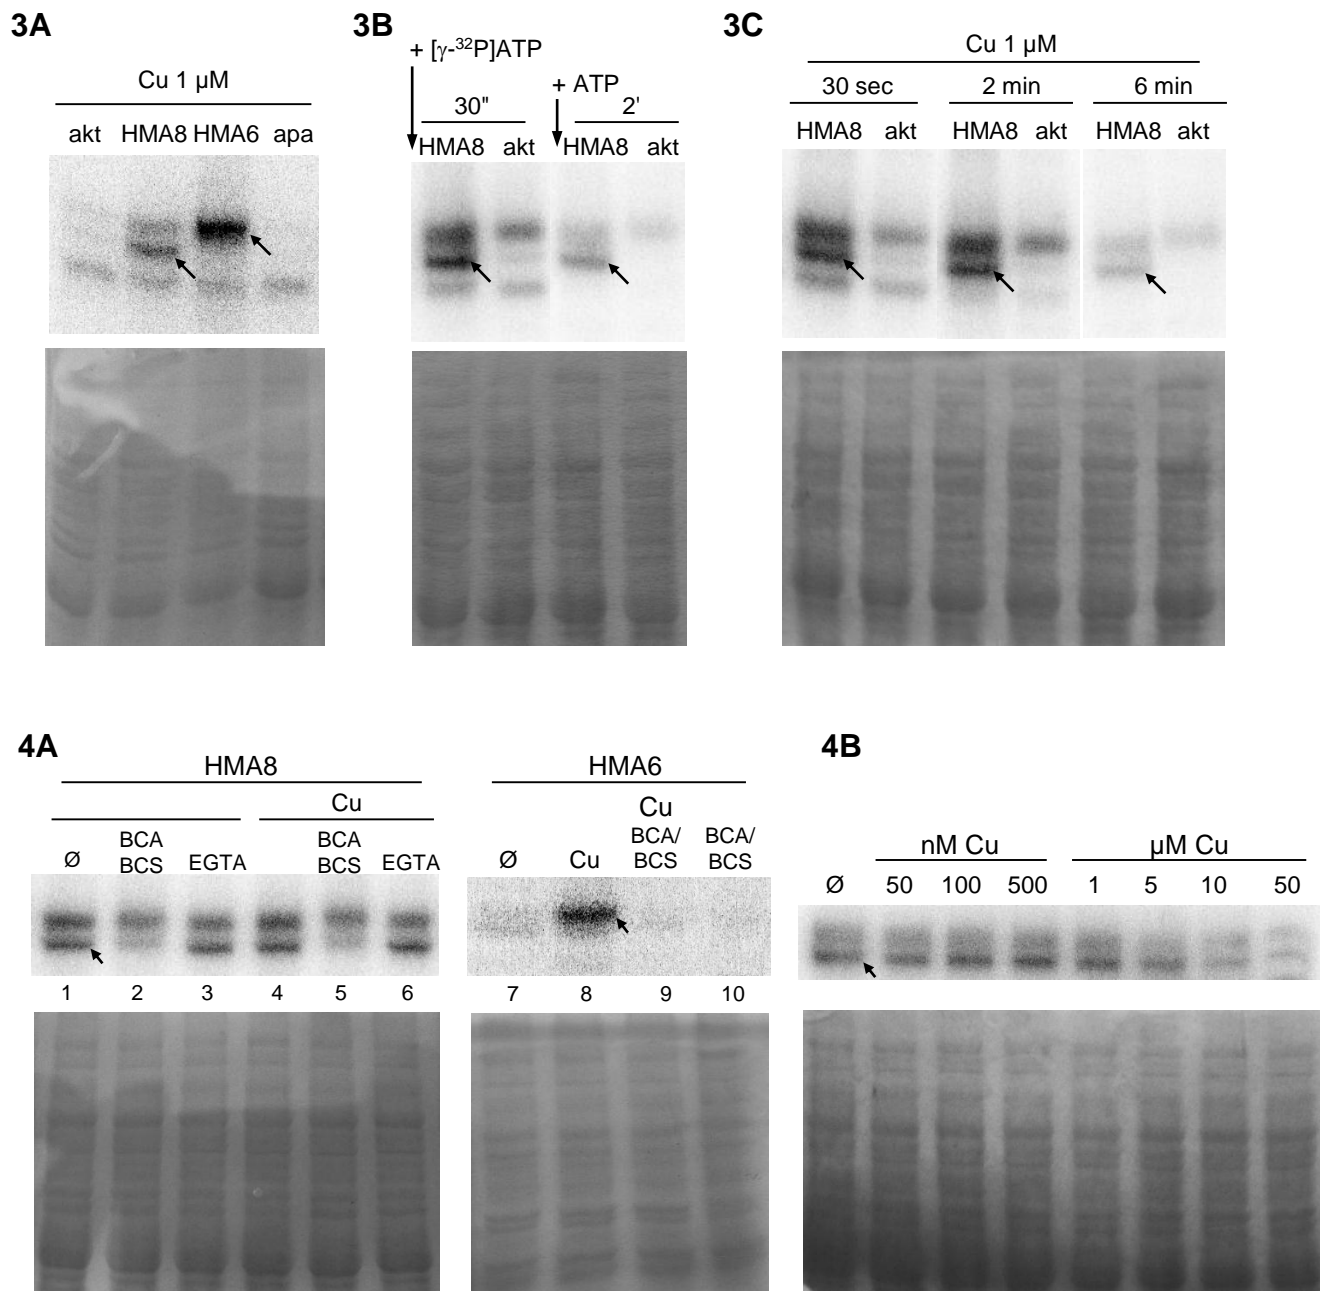

**Supplemental Figure 3.** Coomassie blue stained gels corresponding to the phosphorylation gels of the Figures 3 and 4. See Figures 3 and 4 for the legends.

## Supplemental Figure 4

5B

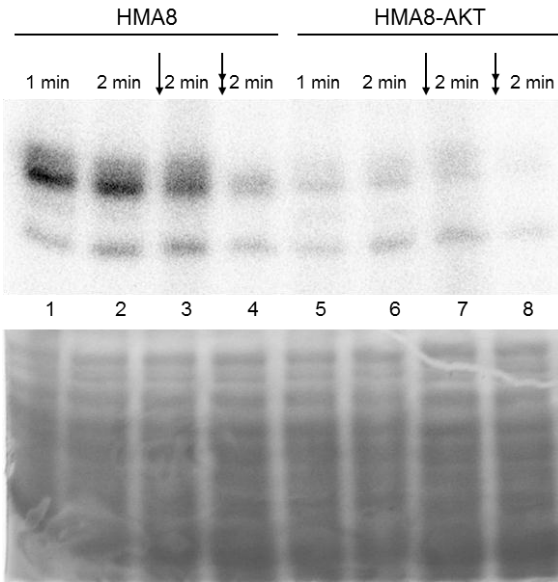

6A

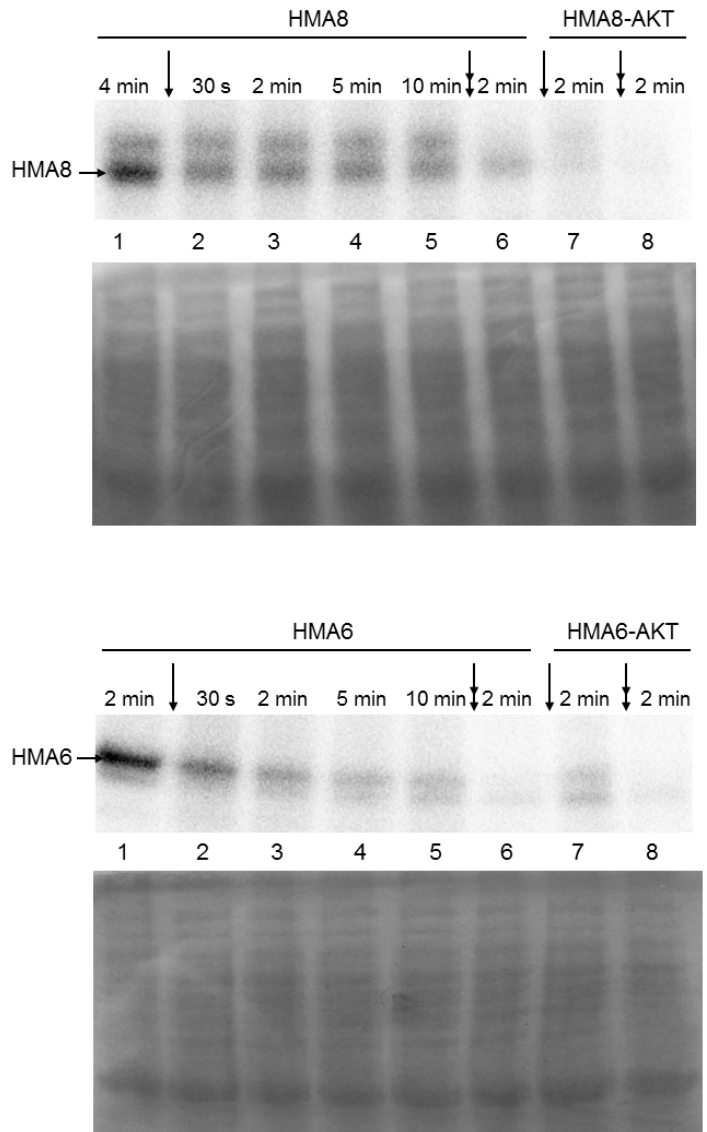

**Supplemental Figure 4.** Coomassie blue stained gels corresponding to the phosphorylation gels of the Figures 5B and 6A. See Figures 5B and 6A for the legends.
